# Supplementary material
Source: publisher figshare collection journal article supplement (https://acs.figshare.com/ndownloader/files/5467514)
Supplement: Supplementary file 1 [file 5467514]

# Supporting Information for

## Improving the Membrane Permeability of 5-Fluorouracil via Cocrystallization

Xia-Lin Dai, Song Li, Jia-Mei Chen,\* Tong-Bu Lu

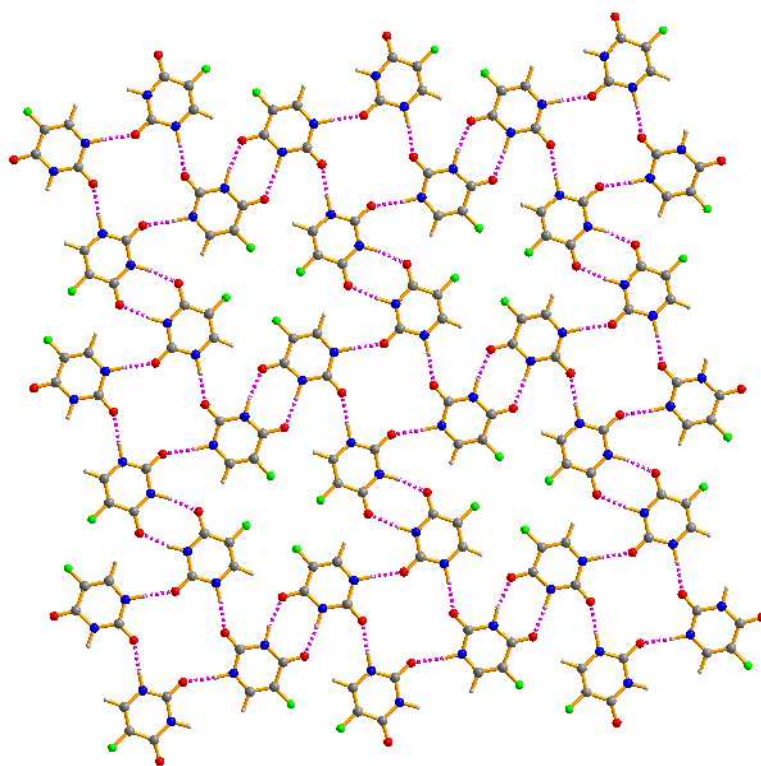

**Figure S1.** The crystal structure of form I of 5FU.

(a)

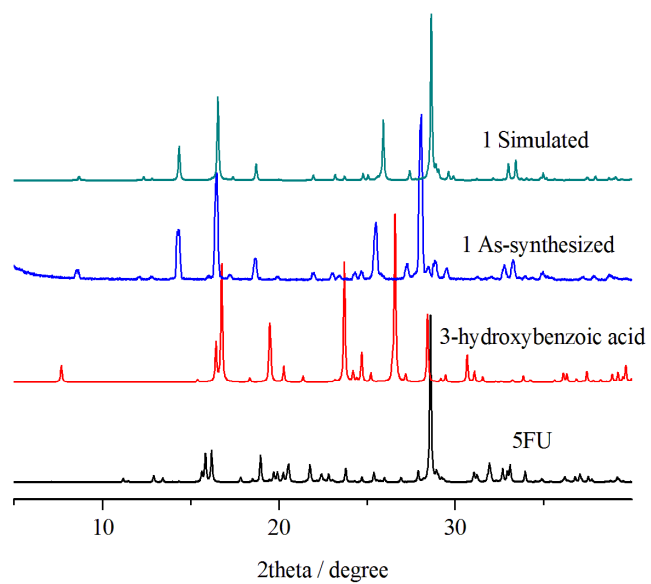

(b)

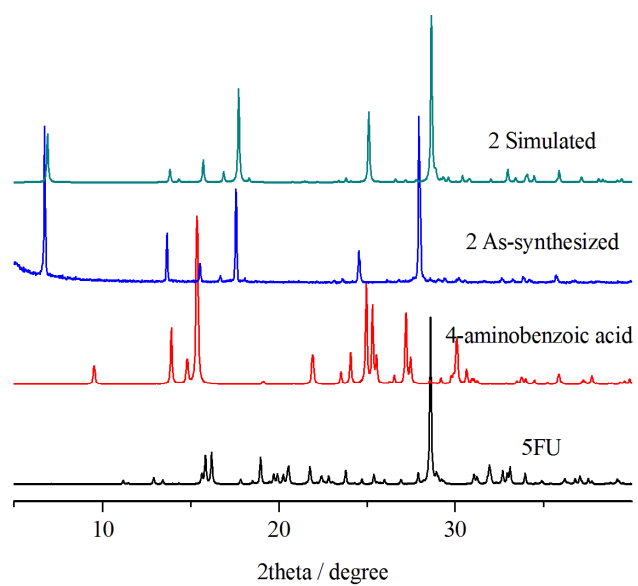

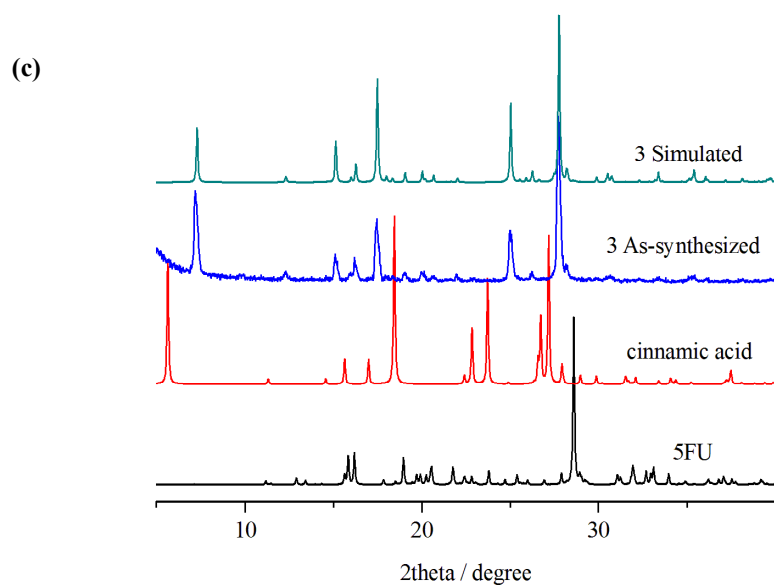

**Figure S2.** XRPD patterns of 5FU, coformers, as-synthesized by slurry and simulated from the single crystal data for (a) **1**, (b) **2** and (c) **3**.

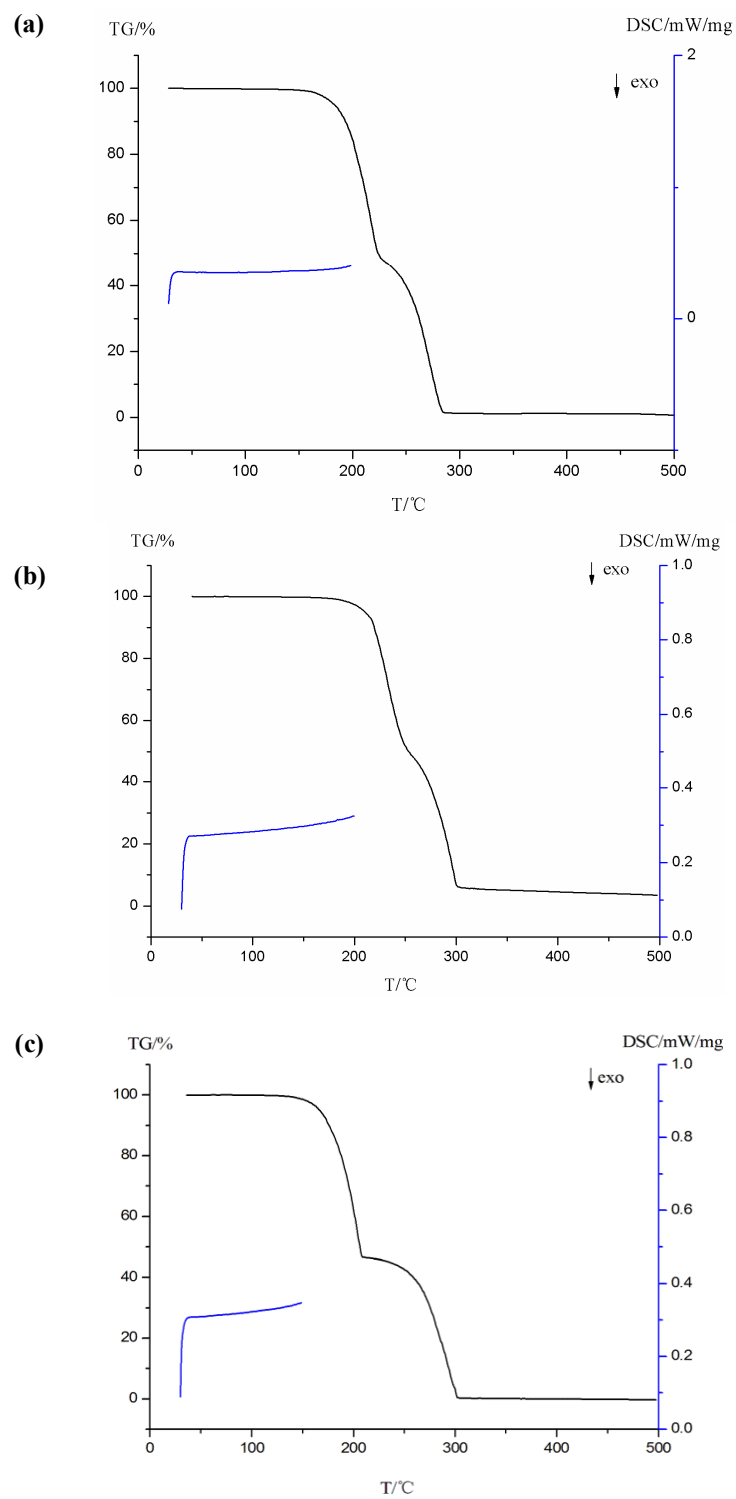

**Figure S3.** DSC-TG curves for (a) **1**, (b) **2** and (c) **3**.

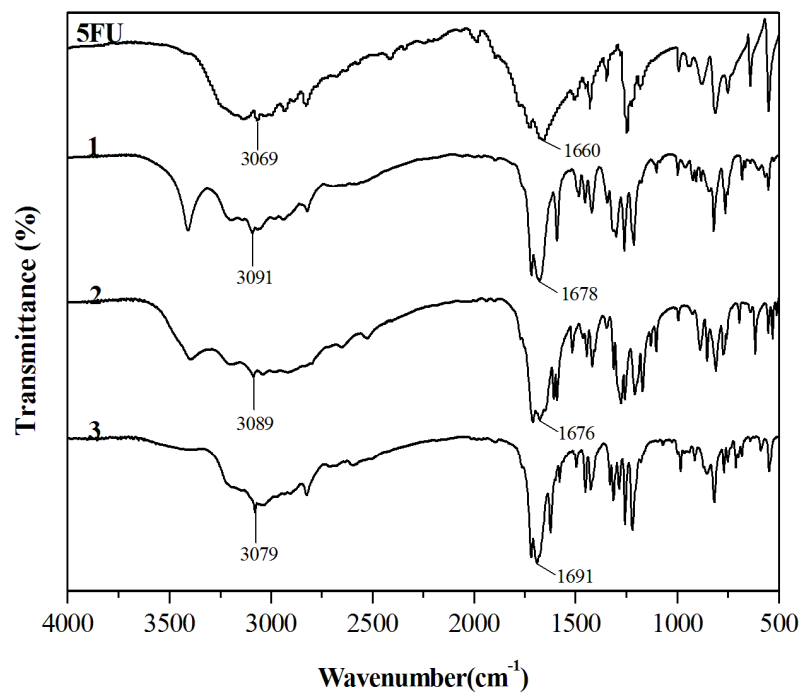

**Figure S4.** IR spectra of 5FU and **1-3**.

**(a)**

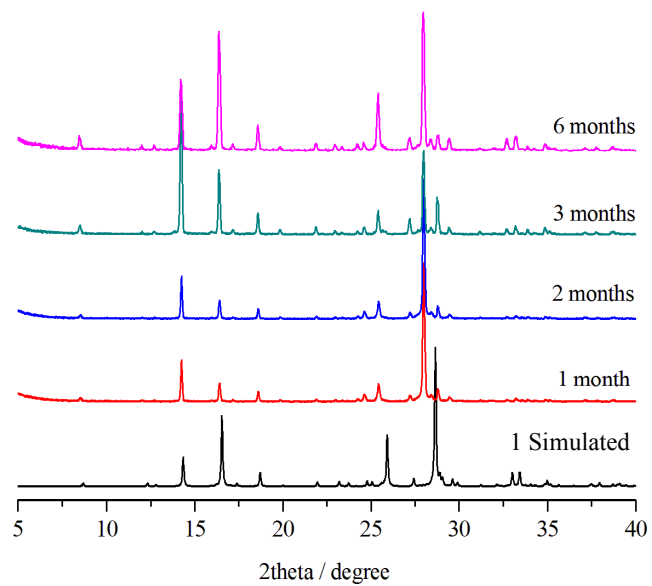

**(b)**

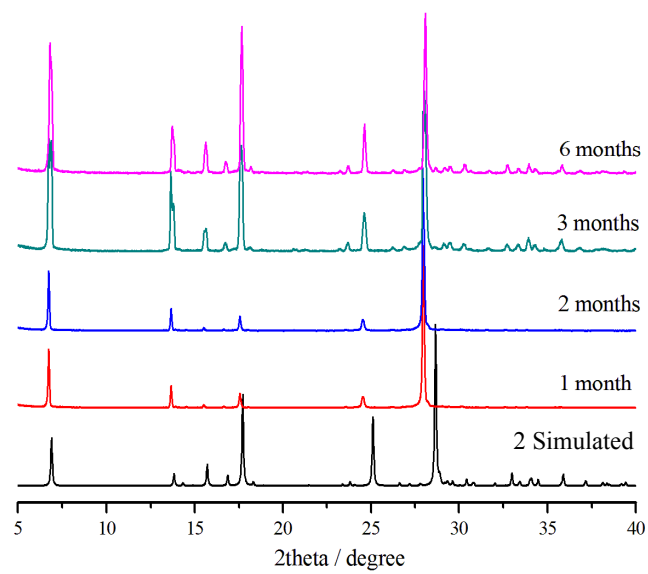

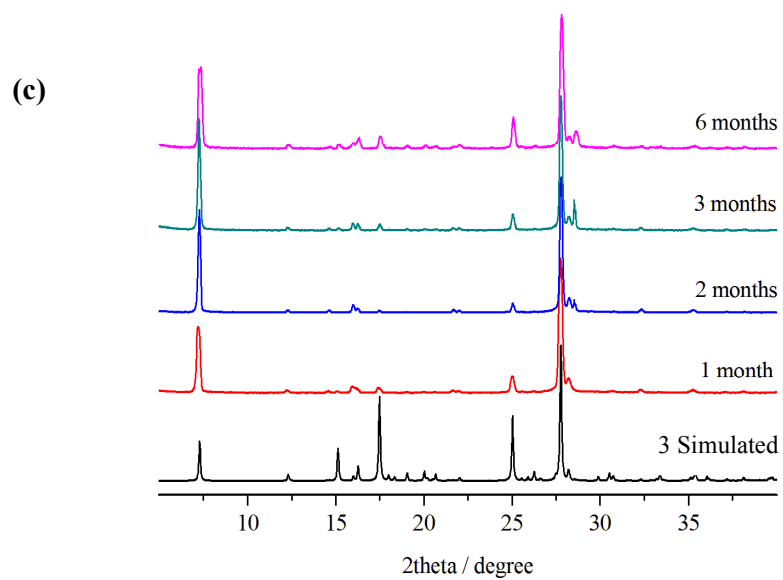

**Figure S5.** XRPD patterns of (a) **1**, (b) **2** and (c) **3** at different storage time points during ICH accelerated stability test.
